# Supplementary material
Source: PubMed Central journal article supplement (PMC2681610)
Supplement: supp_8_5_800__1.pdf [file supp_8_5_800__1.pdf]

**Supplementary Table 1. Primers used for the generation of cassettes components for locus-specific modifications.**

*bar* cassette

|    |                      |
|----|----------------------|
| FW | actagtttctcggactatg  |
| RV | tctagactcgacagaagatg |

V5 epitope

|    |                                               |
|----|-----------------------------------------------|
| FW | atgggtaagcctatccctaaccctctcctcggctcgcattctacg |
|----|-----------------------------------------------|

*qa-2* promoter

|                  |                      |
|------------------|----------------------|
| FW (for 1000 bp) | tagagtccttgacaagcagt |
| FW (for 600 pb)  | taaaacgttcgcccatcaac |
| RV               | tgtgttggtacctctggtt  |

*actin* 3' UTR

|    |                      |
|----|----------------------|
| FW | agtgggtgcccttgagaggt |
| RV | ttggcaagatcaagaagccc |

V5His6X tag<sup>\*</sup>

|    |                             |
|----|-----------------------------|
| FW | ggatctagagggcccttcgaaggtaag |
| RV | tcaatggtgatggtgatgatg       |

\*The V5His6X sequence was amplified from plasmid pYES2/NT B (Promega)
